# Supplementary material
Source: PubMed Central journal article supplement (PMC3370873)
Supplement: supp_194.12.3189_FigS1-S4_TableS1.pdf [file supp_194.12.3189_FigS1-S4_TableS1.pdf]

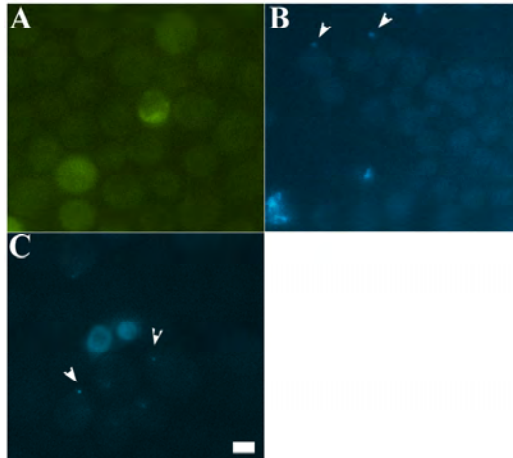

**Fig. S1.** Yeast cells expressing GFP- or CFP- $\mu$ NS-protein fusions alone. **(A)** Cells expressing GFP-FtsZ show diffusely localized fluorescence 3-4 hours post induction of the fusion protein; **(B, C)** Cells expressing CFP- $\mu$ NS-FtsZ or CFP- $\mu$ NS-ZapD fusion proteins displayed characteristic fluorescent focal platforms (arrowheads). Scale bar = 2  $\mu$ m.

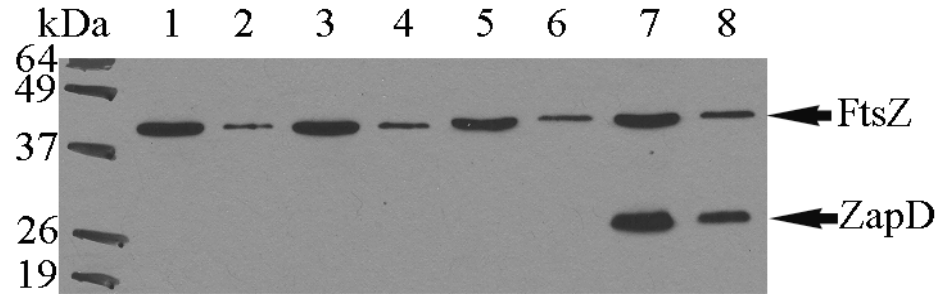

**Fig. S2.** Levels of FtsZ remain unchanged in cells lacking or overexpressing ZapD. Ten  $\mu$ ls of undiluted and 10-fold diluted samples from whole cell protein preparations from wildtype (MG1655; lanes 1 and 2), *zapD* (JD310; lanes 3 and 4), pCA24N bearing wildtype cells (GF 73; lanes 5 and 6) and pCA24N-*zapD* bearing wildtype cells (JD381; lanes 7 and 8) were run on adjacent lanes in a 10% SDS-PAGE gel, blotted and probed for FtsZ with an anti-FtsZ rabbit polyclonal (Genscript) antibody. Intensity profiles were measured by ImageJ (NIH). In cells bearing pCA24N or pCA24N-*zapD* plasmids the blots were probed for ZapD with an anti-ZapD rabbit polyclonal (Genscript). Lanes 7 and 8 show leaky expression of ZapD from the pCA24N vector. In lanes 5 and 6 endogenous levels of ZapD were not detectable due to the low harvest volumes used for whole cell protein preparation in this experiment. Lanes 1 through 4 were not probed for ZapD.

**A.**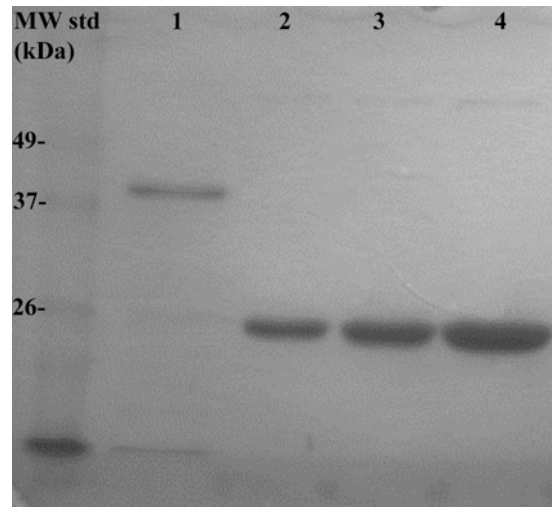**B.**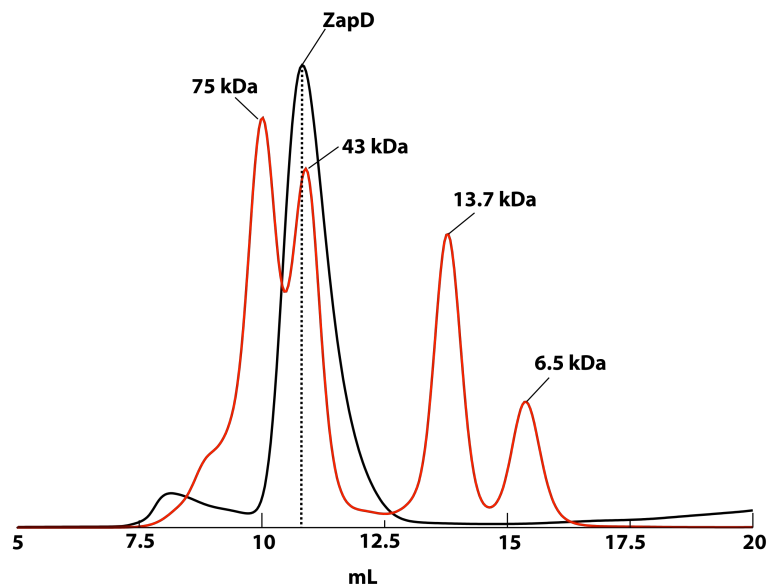

**Fig. S3.** Purified tag-free ZapD is mostly dimeric in solution. **(A)** Two-fold serial dilutions of purified and concentrated ZapD obtained from JD160 cells were run in lanes 2, 3 and 4 and compared to His<sub>10</sub>-Smt3-ZapD fusion protein in lane 1. Conservative estimates of band intensities by ImageJ (NIH) analysis indicate ZapD to be  $\geq 95\%$  pure. **(B)** Elution profile of purified tag-free ZapD separated through a Sephadex75 (GE Healthcare) gel filtration column indicates ZapD (black line) to be mostly dimeric in solution with some higher order oligomers likely present in the solution.

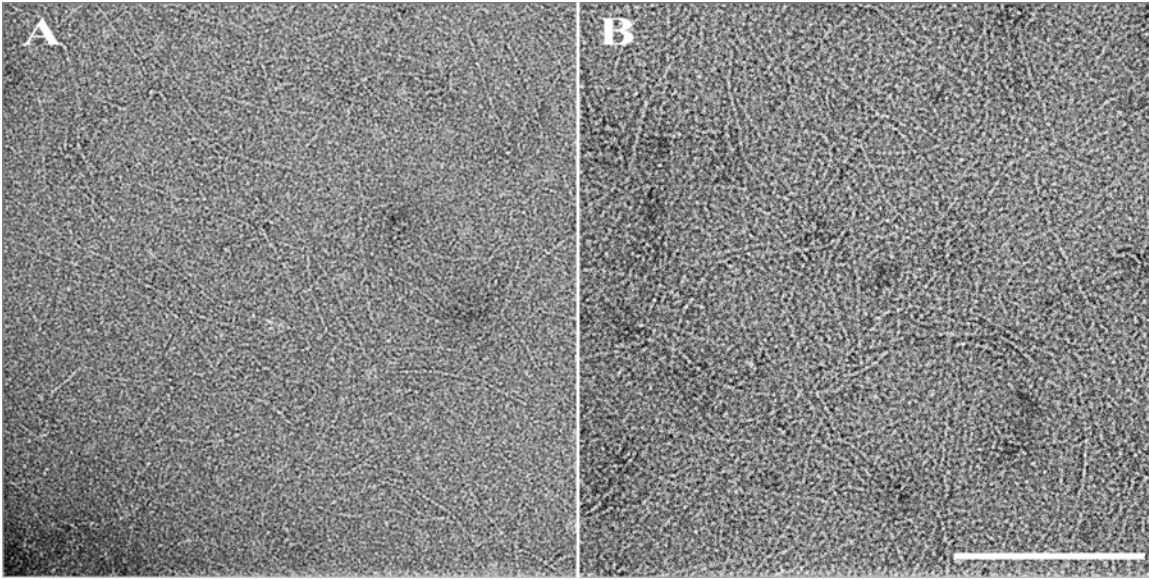

**Fig. S4.** Electron microscopy images of sub-stoichiometric levels of ZapD with respect to FtsZ show occasional bundling of FtsZ protofilaments. **(A)** Negative stained TEM images of FtsZ (5  $\mu\text{M}$ ) in MOPS pH 6.5, 50 mM KCl, 2.5 mM  $\text{MgCl}_2$  buffer in the presence of 1 mM GTP forms characteristic single protofilaments and **(B)** upon addition of ZapD (1  $\mu\text{M}$ ) occasional loosely bundled FtsZ protofilaments are visualized. Scale bar = 200 nm

**Table S1.** DNA oligonucleotides used in the study.

|                       |                                                                 |
|-----------------------|-----------------------------------------------------------------|
| ftsZ 3P GW            | GGGGACAAC TTTGTACAAGAAAGTTGGTTAATCAGCTTGCTTAC<br>GCAGGAAT       |
| ftsZ-372 3P GW        | GGGGACAAC TTTGTACAAGAAAGTTGGTTACAGATAATCCGGC<br>TCTTTCGCA       |
| ftsZ-314 3P GW        | GGGGACAAC TTTGTACAAGAAAGTTGGTTACCTGTCGCAACAA<br>CGGTTACG        |
| ftsZ 5P GW            | GGGGACAAC TTTGTACAAAAAAGTTGGCATGTTTGAACCAATG<br>GAACTTACCAATG   |
| ftsZ-289-383 5P GW    | GGGGACAAC TTTGTACAAAAAAGTTGGCATGAACGCGACTGTG<br>GTTATCGGTACTT   |
| ftsZ-364-383 5P GW    | GGGGACAAC TTTGTACAAAAAAGTTGGCATGCAAAC TGC GAAA<br>GAGCCGGATTATC |
| ftsZ-374-383 5P GW    | GGGGACAAC TTTGTACAAAAAAGTTGGCATGATCCCAGCATTCC<br>TGCGTAAGCAAG   |
| new YacF tst 5P       | TGCTCAGGCAACGCGCGAAGCCCGCCTTGC                                  |
| new YacF tst 3P       | TTCAGCAGCCCAT TCTCCGAGGTCGATCAG                                 |
| Sall yacF 5P          | ACGCGTCGACAGGAGGGCCAGCATGCAGACCCAGGTC                           |
| Sall yacF 3P          | AAAAGTCGACGCAACAGGCCAGTTCGAA                                    |
| SUMO-5 YacF-<br>BamHI | CGCGGATCCATGCAGACCCAGGTCCTTTTTG                                 |

|                         |                                                              |
|-------------------------|--------------------------------------------------------------|
| SUMO-3 YacF-<br>HindIII | CCCAAGCTTTTAGCAACAGGCCAGTTCGAA                               |
| yacF 5P GW              | GGGGACAAC TTTGTACAAAAAAGTTGGCATGCAGACCCAGGTC<br>CTTTTTGAACAT |
| yacF 3P GW              | GGGGACAAC TTTGTACAAGAAAGTTGGTTAGCAACAGGCCAGT<br>TCGAAATCC    |
| yacF 3P GW-C            | GGGGACAAC TTTGTACAAGAAAGTTGGGCAACAGGCCAGTTCG<br>AAATCCAGA    |
| YcbW FP tst             | GCGAAGCGACAATGG                                              |
| YcbW RP tst             | CACCATTCTTTGCTG                                              |
| ZapA-tstFP              | GCCCTGGTGGACCAG                                              |
| ZapA-tstRP              | CAACCGCGGAGCGCC                                              |
